# Supplementary material for: Folic Acid-Functionalized Black Phosphorus Quantum Dots for Targeted Chemo-Photothermal Combination Cancer Therapy
Source: Pharmaceutics. 2019 May 21;11(5):242. doi: 10.3390/pharmaceutics11050242 (PMC6571808; doi:10.3390/pharmaceutics11050242)
Supplement: Supplementary file 1 [file pharmaceutics-11-00242-s001.pdf]

# Supplementary Materials: Folic Acid-Functionalized Black Phosphorus Quantum Dots for Targeted Chemo-Photothermal Combination Cancer Therapy

Miaomiao Luo, Wei Cheng, Xiaowei Zeng, Lin Mei, Gan Liu and Wenbin Deng

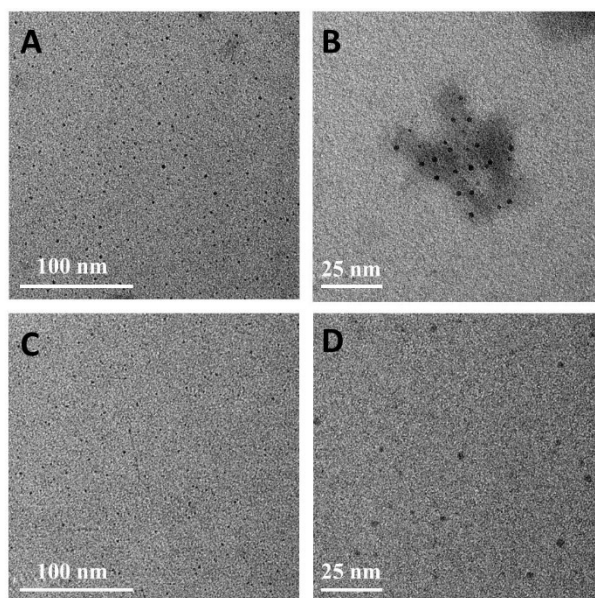

**Figure 1.** TEM images of (A)-(B) BPQDs and (C)-(D) BPQDs-PEG-FA.

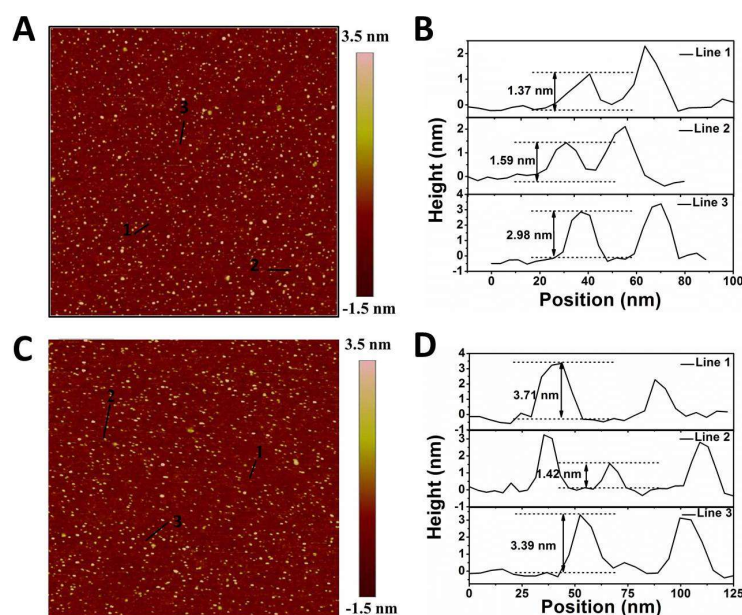

**Figure 2.** (A) AFM image of BPQDs. (B) Height profiles along the white lines in A. (C) AFM image of BPQDs-PEG-FA. (D) Height profiles along the white lines in C.

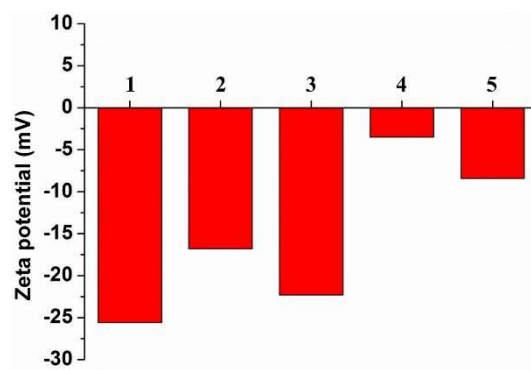

**Figure 3.** Zeta potentials of BPQDs-based NPs. 1, 2, 3, 4 and 5 represent BPQDs, BPQDs-PEG, BPQDs-PEG-FA, BPQDs-PEG/DOX and BPQDs-PEG-FA/DOX, respectively.

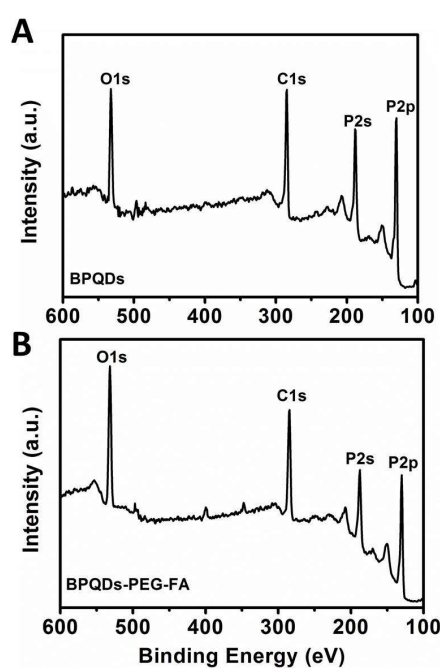

**Figure 4.** XPS spectrum of (A) BPQDs and (B) BPQDs-PEG-FA.

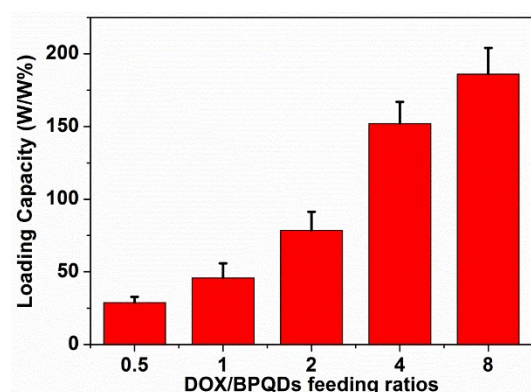

**Figure 5.** DOX loading capacities on BPQDs-PEG-FA (w/w %) with increasing DOX/NPs feeding ratios.

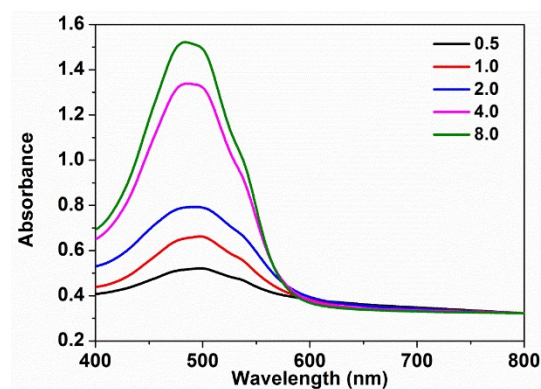

**Figure 6.** UV-vis-NIR spectra of BPQDs-PEG-FA /DOX at different DOX/NPs feeding ratios after the removal of excess free DOX.

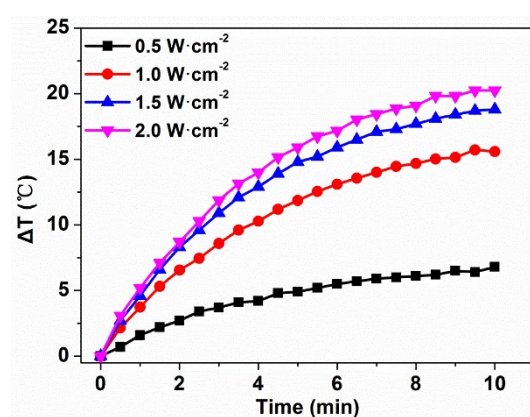

**Figure 7.** Photothermal heating curves of BPQDs-PEG-FA/DOX under different power intensities.

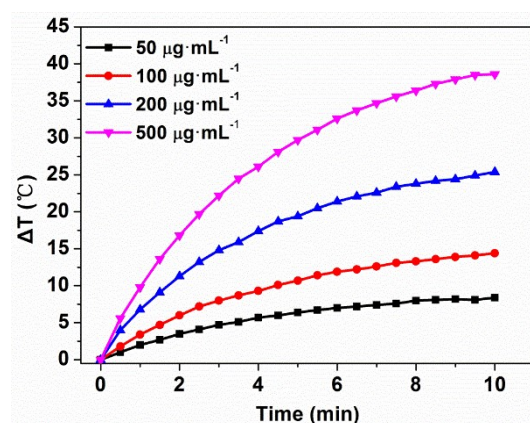

**Figure 8.** Temperature variation curves of the BPQDs solution under different concentrations ( $1 \text{ W cm}^{-2}$ , 10 min).

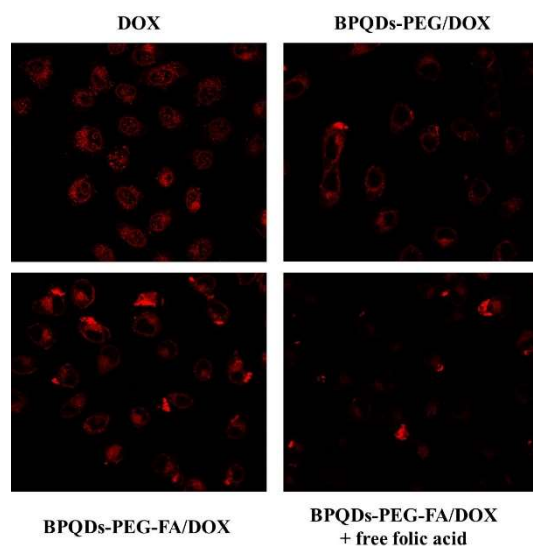

**Figure 9.** Confocal images of HeLa cells incubated with free DOX, BPQDs-PEG/DOX, BPQDs-PEG-FA/DOX and BPQDs-PEG-FA/DOX + free folic acid after incubation for 0.5 h.

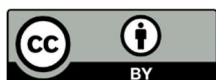

© 2019 by the authors. Submitted for possible open access publication under the terms and conditions of the Creative Commons Attribution (CC BY) license (<http://creativecommons.org/licenses/by/4.0/>).
